# Supplementary material for: The Anti-Angiogenic Activity of a Cystatin F Homologue from the Buccal Glands of Lampetra morii
Source: MDPI journal article supplement (doi:10.3390/md16120477), 2018-11-29
Supplement: s1 [file s1]

# Supplementary Material

**Accession:** ENSFMAP00000007215 **Score:** 73.41  
**Database:** lamprey **MW [kDa]:** 17.10  
**Seq. Coverage [%]:** 11.10 % **pl:** 10.31  
**No. of Peptides:** 2

|            |            |            |            |            |            |            |            |            |            |            |            |
|------------|------------|------------|------------|------------|------------|------------|------------|------------|------------|------------|------------|
| 10         | 20         | 30         | 40         | 50         | 60         | 70         | 80         | 90         | 100        | 110        | 120        |
| MSRVASLSLL | LCGLYCCCC  | AALPETRWRP | MLGAPTAIQP | TDPGLHTAAA | EATRRFNSSL | NSRTVYRLDR | VTKATRIQVS | GLKYIFEADL | KSTECLKSEE | RVAEDCNFHD | DGVATVFKCR |
| 130        | 140        | 150        | 160        |            |            |            |            |            |            |            |            |
| FEVWTIPWRK | QTKVLSQSCQ | QNNPIKPSTM | PNA        |            |            |            |            |            |            |            |            |

| Cmpd. | No. of Cmps. | m/z meas. | $\Delta$ m/z [ppm] | z | Rt [min] | Score | P | Range   | Sequence    | Modification |
|-------|--------------|-----------|--------------------|---|----------|-------|---|---------|-------------|--------------|
| 1168  | 2            | 499.7650  | 3.48               | 2 | 33.4     | 30.6  | 0 | 84-91   | KYIFEADLK.S |              |
| 2203  | 3            | 617.3259  | 2.48               | 2 | 41.6     | 42.9  | 0 | 121-129 | RFEVWTIPWRK |              |

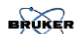

## Detailed Protein Report

### Project Info

**Name:** libowen **Date:** April 16, 2014

### Sample Info & Protocols

**Date:** January 26, 2015

**Name:** 20150125B5

### Search Result Info

| Search Result                               | Location                                       | Search Engine | Database                        | Ident. Compounds |
|---------------------------------------------|------------------------------------------------|---------------|---------------------------------|------------------|
| Impact_PH_130411_Mascot_2015-01-26 06:17:31 | /libowen/20150125B5/ProteinAnalysisResults.mgf | Mascot, 2.4.0 | lamprey, lamprey_20130124.fasta | 109/3589         |

**Figure S1.** The identification of a cystatin F homologue from the buccal glands of feeding *L. morii*.

**Project Info**  
**Name:** NANO-U3000 **Date:** April 17, 2018  
**Sample Info & Protocols**  
**Name:** 201807152S **Date:** July 5, 2018  
**Search Result Info**  
**Search Result** **Location** **Search Engine** **Database** **Ident. Compound**  
 Impact\_PH\_130411\_Mascot\_2018-07-19 06:24:16 /NANO-U3000/201807152S/20180712B8\_RB8\_01\_2183.mgf Mascot, 2.4.0 LIP, LIP\_01.fasta 7/6635

**Protein 1:** >CystatinF  
**Accession:** CystatinF **Score:** 231.98  
**Database:** LIP **MW [kDa]:** 17.10  
**Seq. Coverage [%]:** 46.70 % **pl:** 9.77  
**No. of Peptides:** 6  
**Modification(s):** Carboxymethyl

| Cmpd. | No. of Cmps. | m/z meas. | $\Delta$ m/z [ppm] | z | Rt [min] | Score | P | Range   | Sequence                | Modification     |
|-------|--------------|-----------|--------------------|---|----------|-------|---|---------|-------------------------|------------------|
| 2113  | 4            | 504.2650  | -4.19              | 2 | 24.9     | 46.6  | 0 | 54-62   | R.LFNSGLNSR.T           |                  |
| 2633  | 3            | 862.4787  | -7.37              | 2 | 29.8     | 59.3  | 1 | 76-90   | R.QM/SGLYFEADLK.S       |                  |
| 2319  | 1            | 962.9243  | 1.62               | 2 | 26.8     | 18.4  | 0 | 101-117 | R.VAEDCNFHDG/VATVFKC    | Carboxymethyl: 5 |
| 2916  | 13           | 617.3160  | -13.62             | 2 | 32.2     | 46.8  | 0 | 120-128 | R.FEVWTIPWRK            |                  |
| 2633  | 5            | 681.3698  | -3.09              | 2 | 29.6     | 32.3  | 1 | 120-129 | R.FEVWTIPWRK.Q          |                  |
| 2223  | 7            | 1108.5174 | -2.14              | 2 | 25.9     | 28.6  | 0 | 133-152 | K.VLSQSGCEGNPKPSTMPNA.- | Carboxymethyl: 6 |

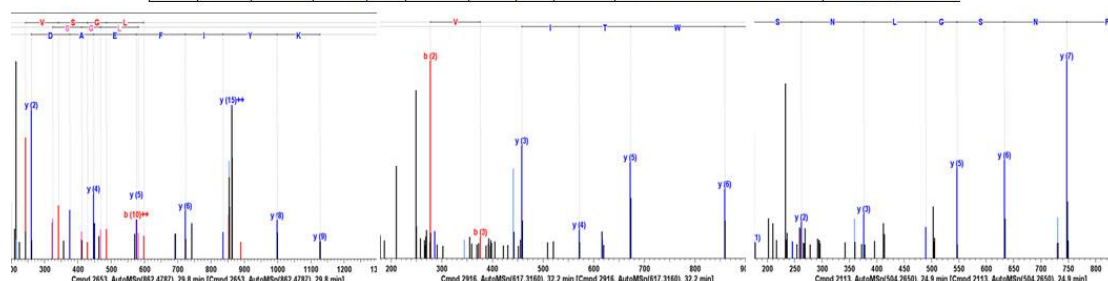

**Figure S2.** The expressed rLm-cystatin F was identified by mass spectrometry.

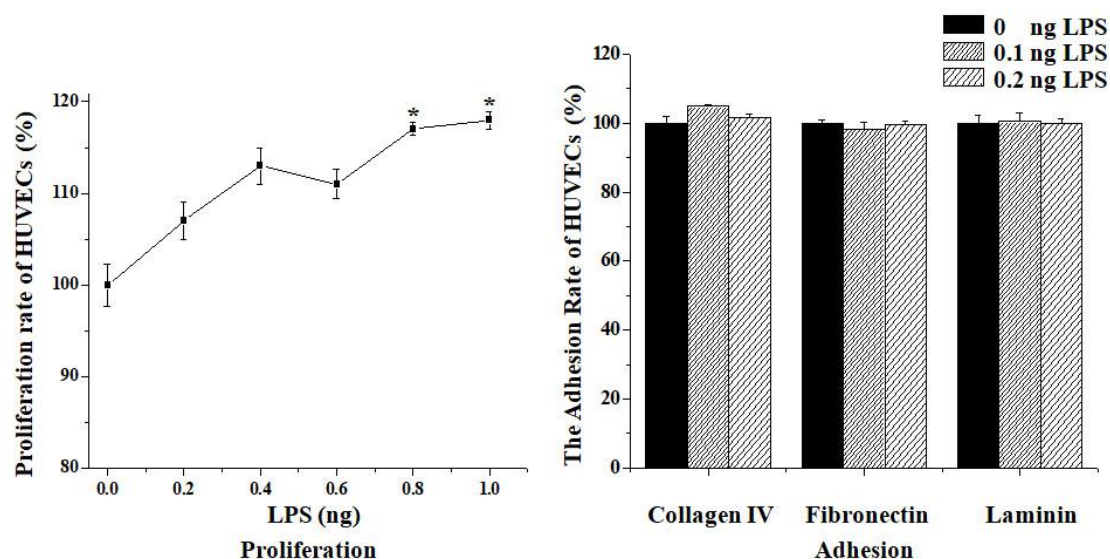

**Figure S3.** LPS did not inhibit the proliferation and adhesion rate of HUVECs. Relative to the PBS group, \*  $p < 0.05$ .

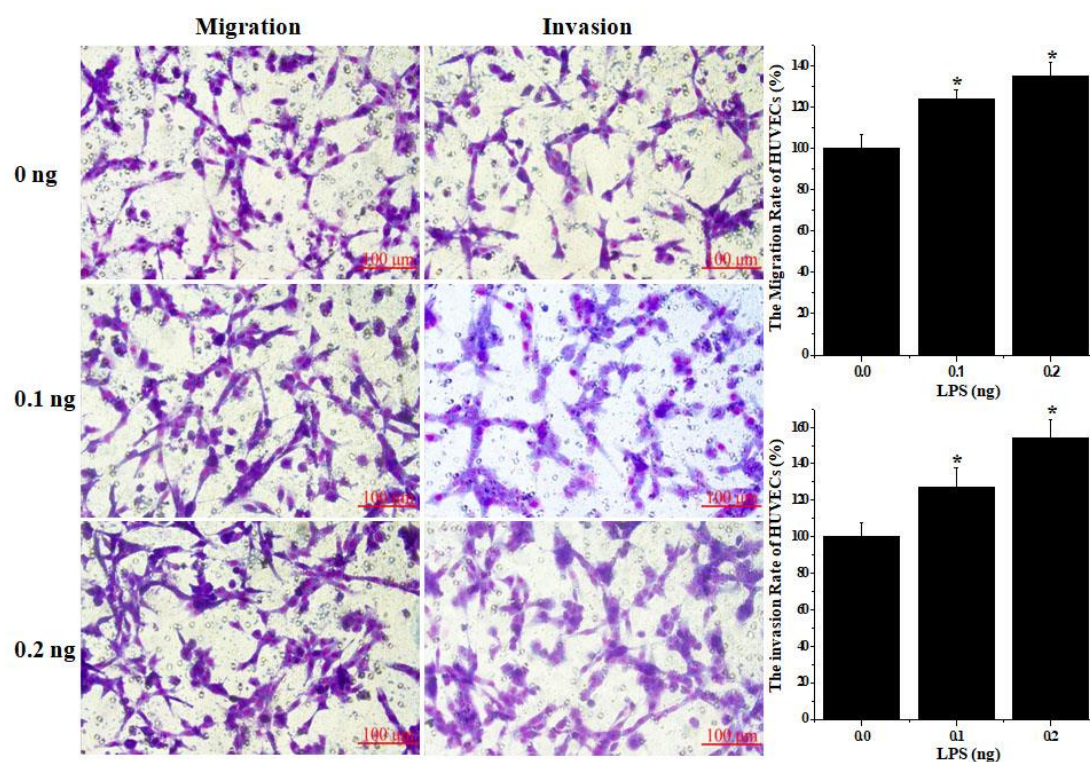

**Figure S4.** LPS did not inhibit the migration and invasion rate of HUVECs. Relative to the PBS group, \*  $p < 0.05$ .

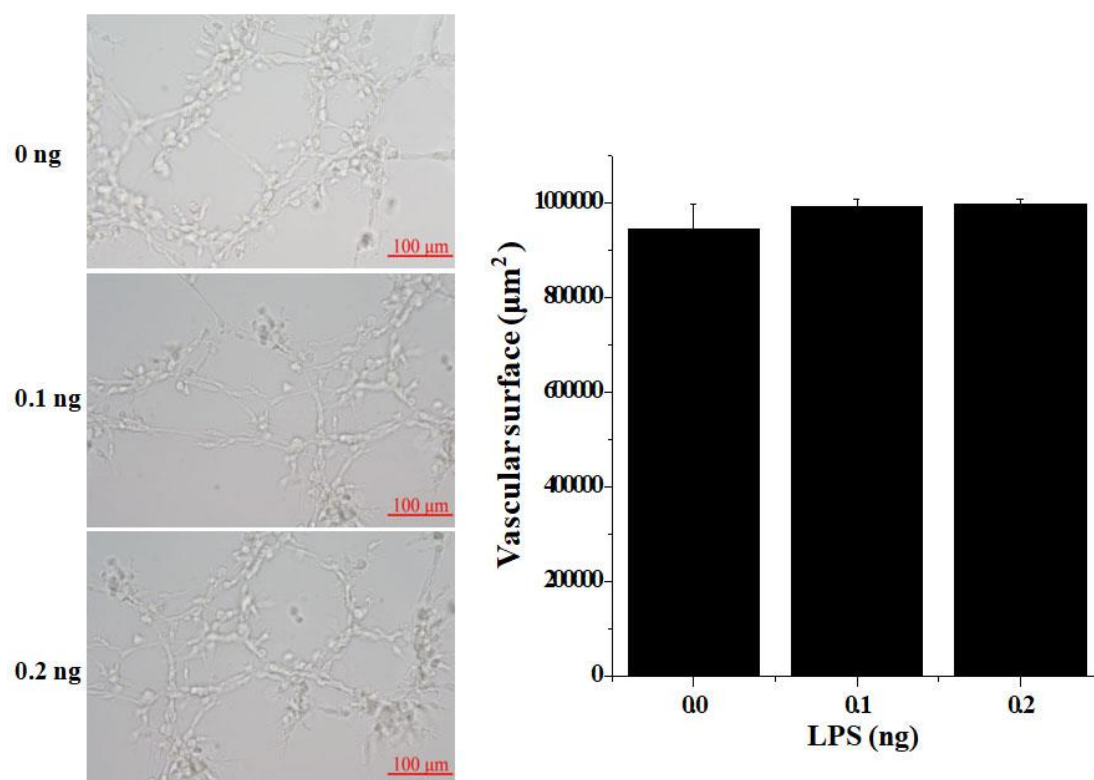

Figure S5. LPS did not affect the tube formation of HUVECs *in vitro*.

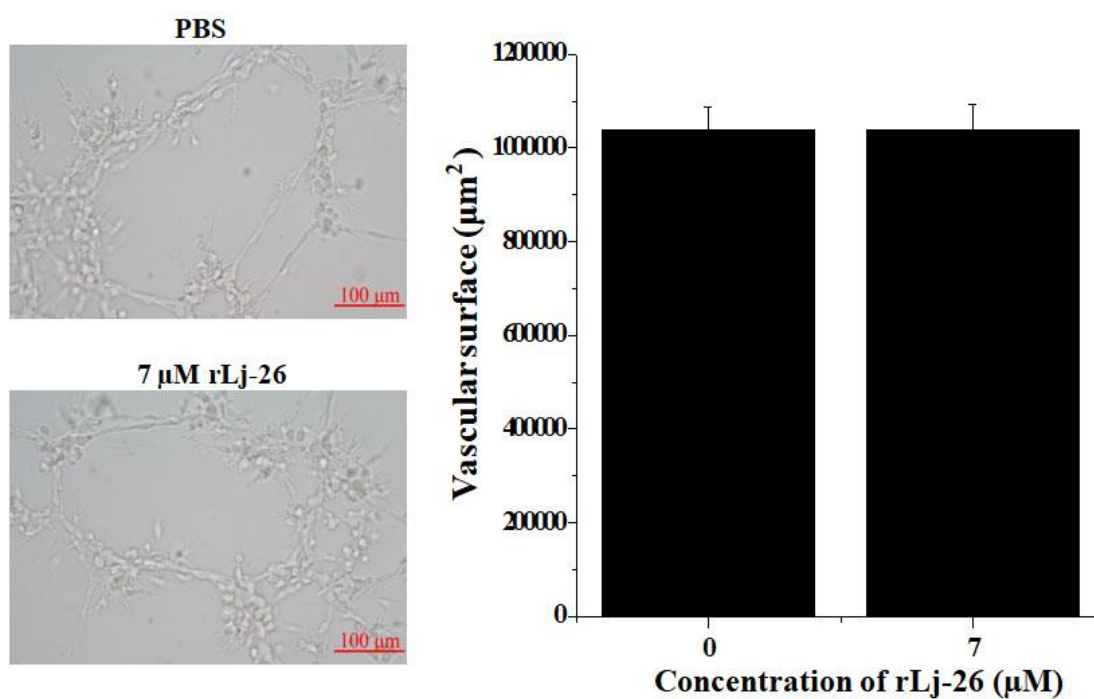

Figure S6. rLj-26 did not inhibit tube formation of HUVECs *in vitro*.

**Table S1.** The websites and softwares were used to analyze the amino acid sequence and bioinformatic information of Lm-cystatin F.

| Predictions                 | Websites and softwares                                                                              |
|-----------------------------|-----------------------------------------------------------------------------------------------------|
| ORF                         | <a href="http://www.ncbi.nlm.nih.gov/gorf/gorf.html">http://www.ncbi.nlm.nih.gov/gorf/gorf.html</a> |
| Physicochemical property    | <a href="http://web.expasy.org/protparam/">http://web.expasy.org/protparam/</a>                     |
| Signal peptide              | <a href="http://www.cbs.dtu.dk/services/SignalP/">http://www.cbs.dtu.dk/services/SignalP/</a>       |
| Functional domains          | <a href="http://smart.embl-heidelberg.de/">http://smart.embl-heidelberg.de/</a>                     |
| Three dimensional structure | <a href="http://swissmodel.expasy.org">http://swissmodel.expasy.org</a> and PyMOL software          |
